# Supplementary material
Source: publisher site journal article supplement (https://www.dovepress.com/article/306507)
Supplement: Supplementary file 1 [file get_supplementary_file.php]

**Supplementary materials**

**Supplement Figure S1. Overall survival according to the BCLC stage in period I (2003-2005).**

**
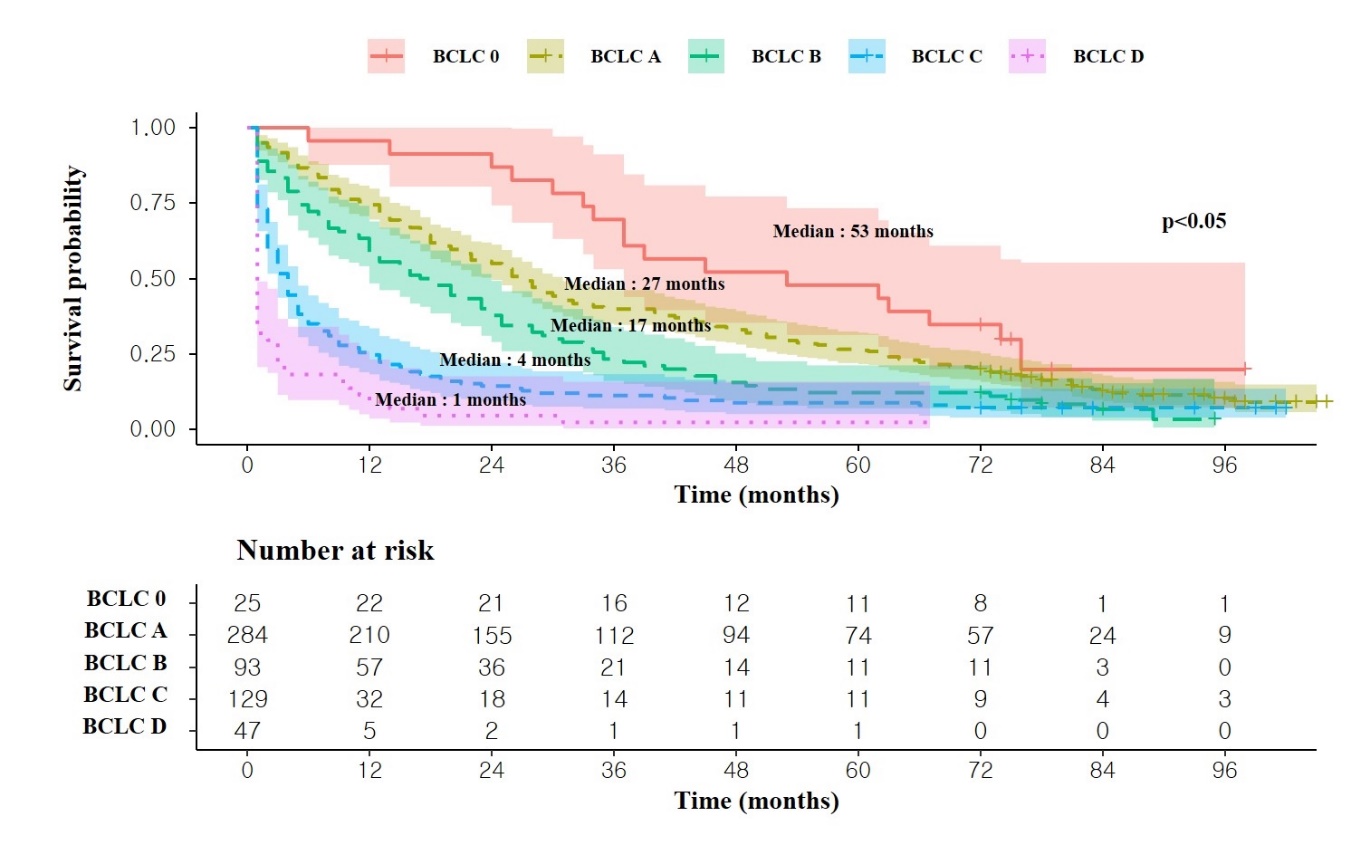
**

**Supplement Figure S2. Overall survival according to the BCLC stage in period II (2008-2014).**

**
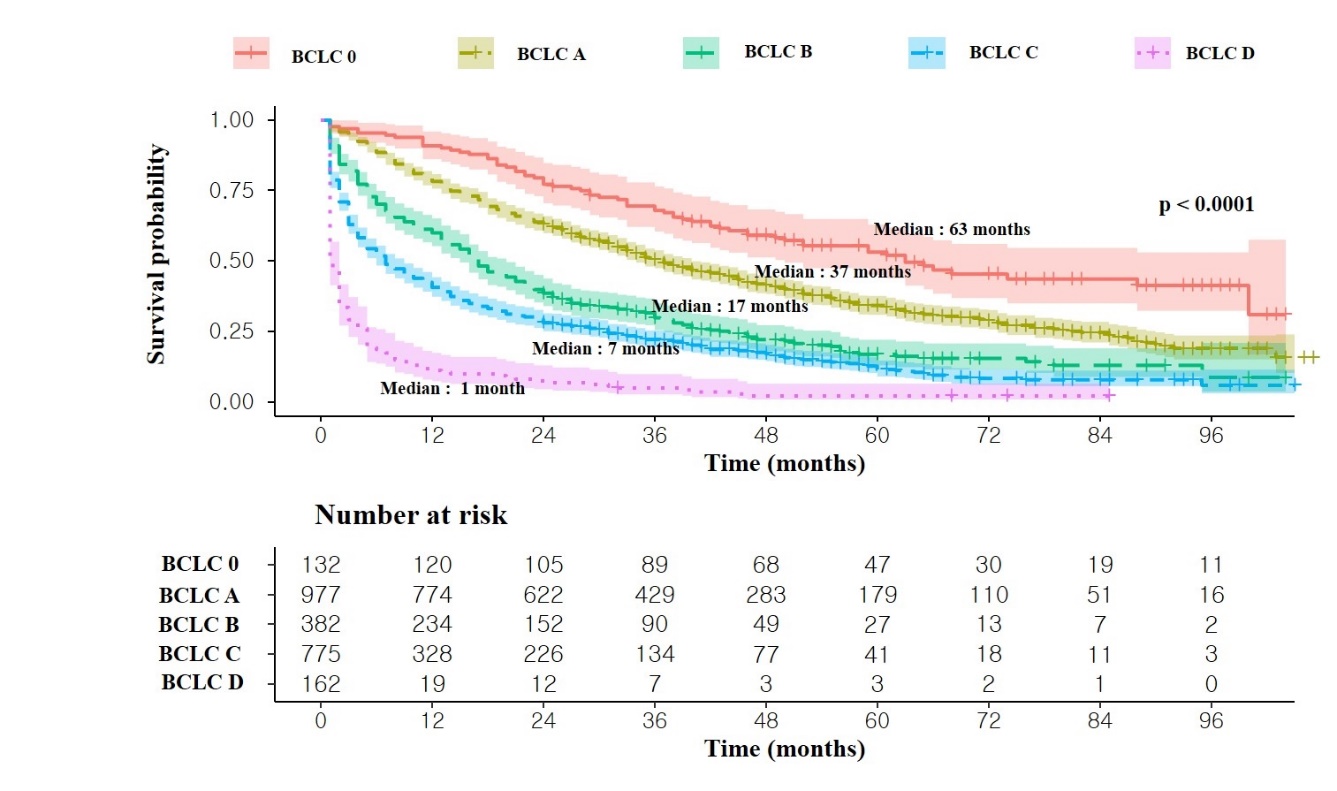
**

**Supplement Figure S3. Overall survival according to treatment modality in each BCLC stage of period I (2003-2005)**

**
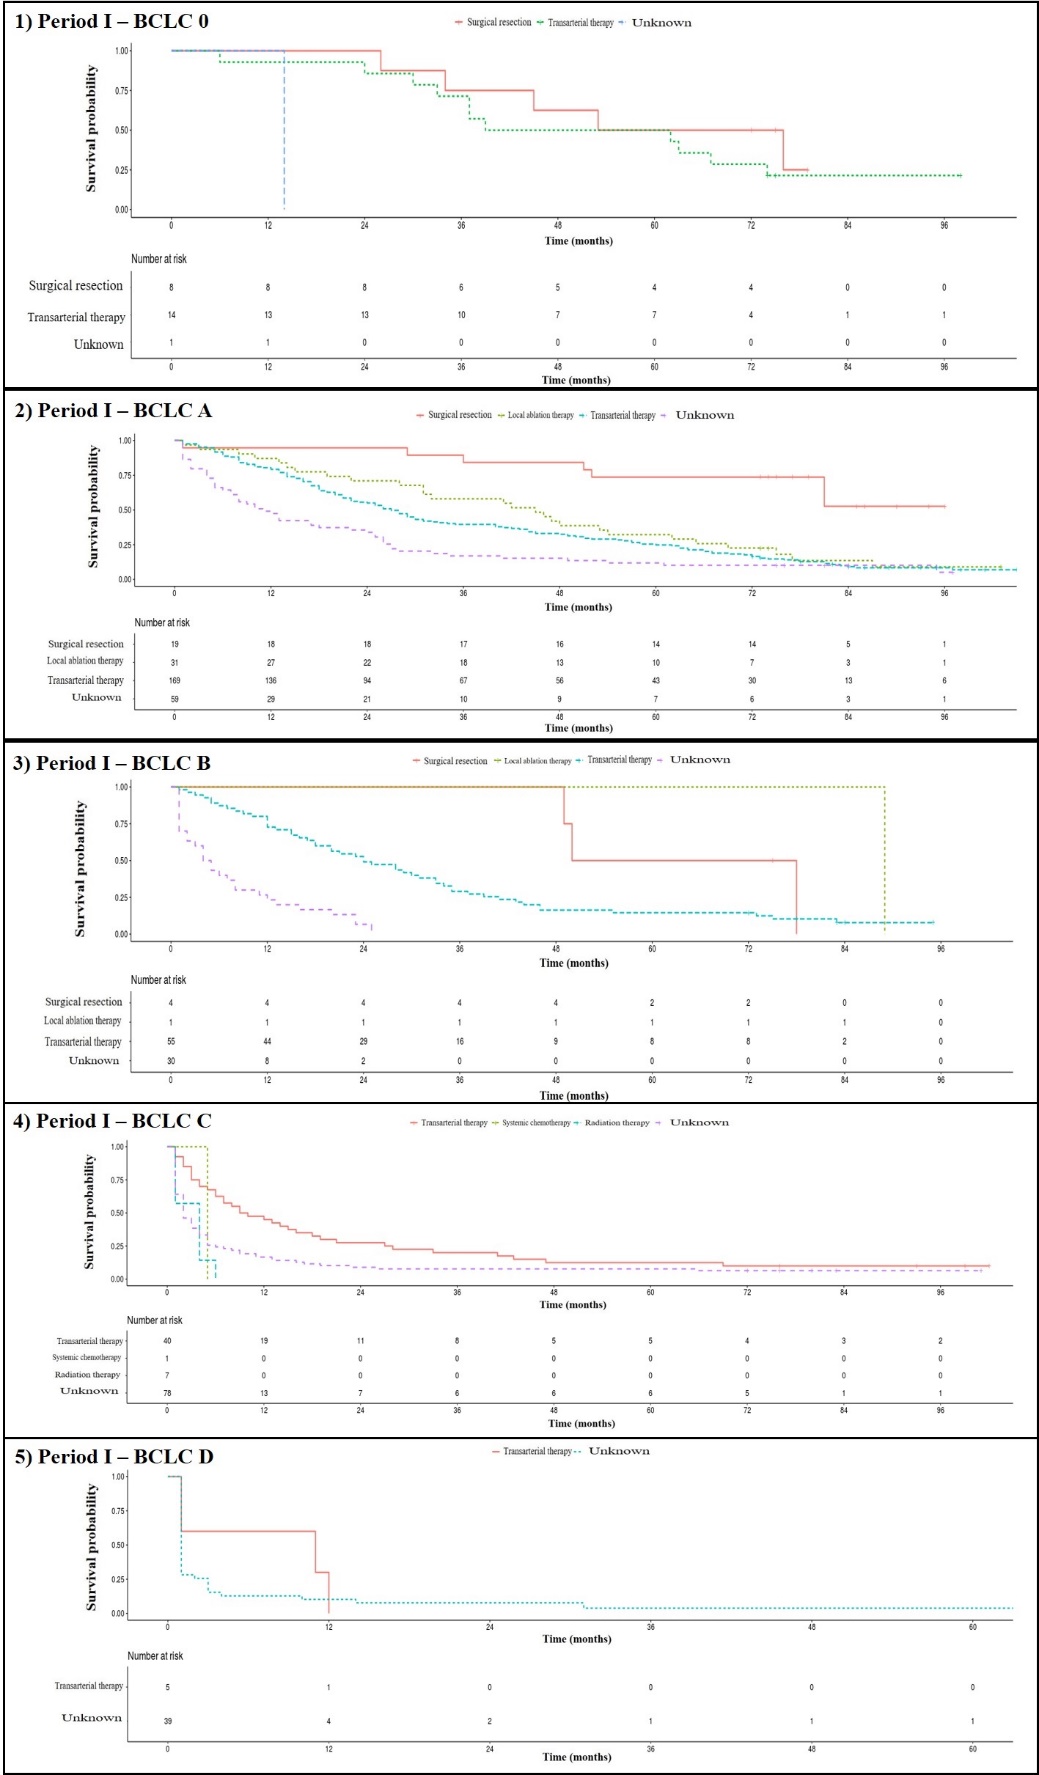
**

**Supplement Figure S4. Overall survival according to treatment modality in each BCLC stage of period II (2008-2014)**

**
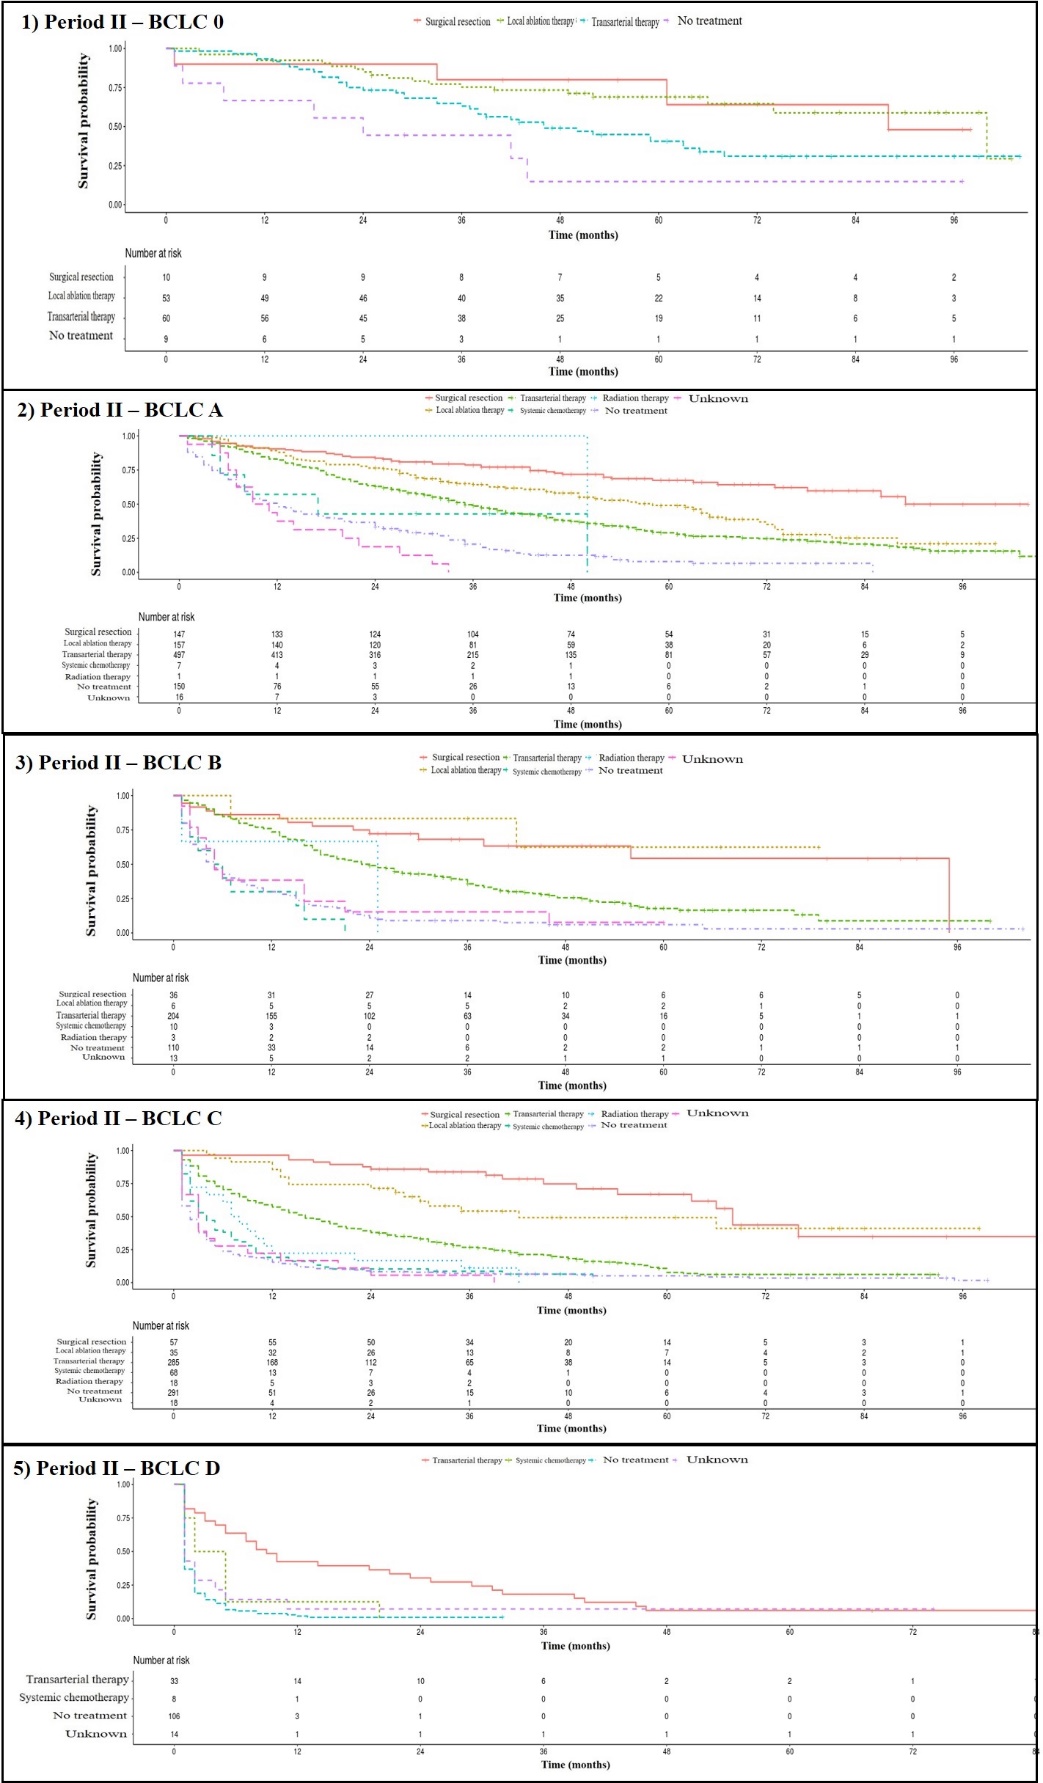
**
